# Supplementary figures and images for: Anomalous behaviour of silver catalyst for soot oxidation explained: state of silver when operating and the influence of potassium ions
Source: Royal Society of Chemistry journal article supplement (doi:10.1039/d3cy01183f), 2023-01-01

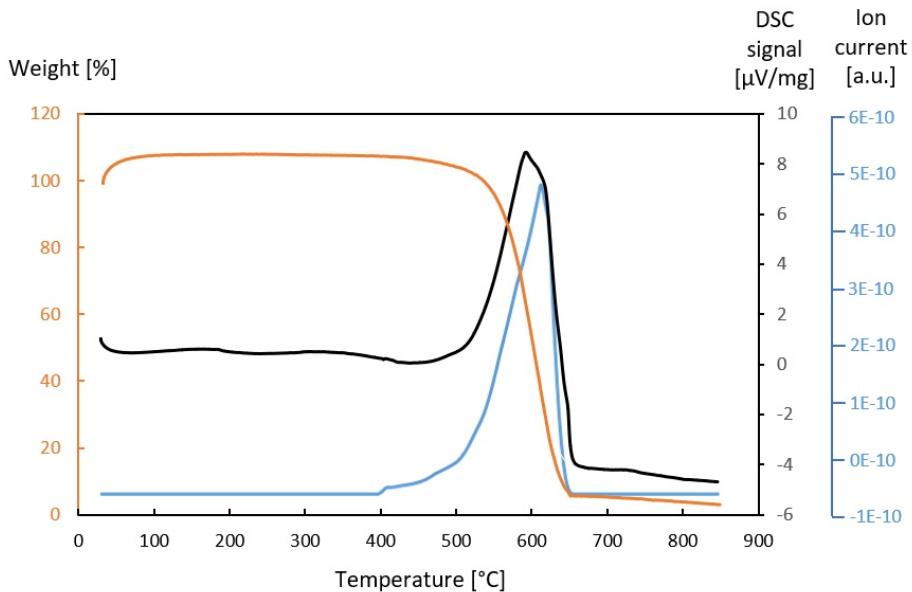

Supplement: d3cy01183f2.pdf [file d3cy01183f2.pdf]

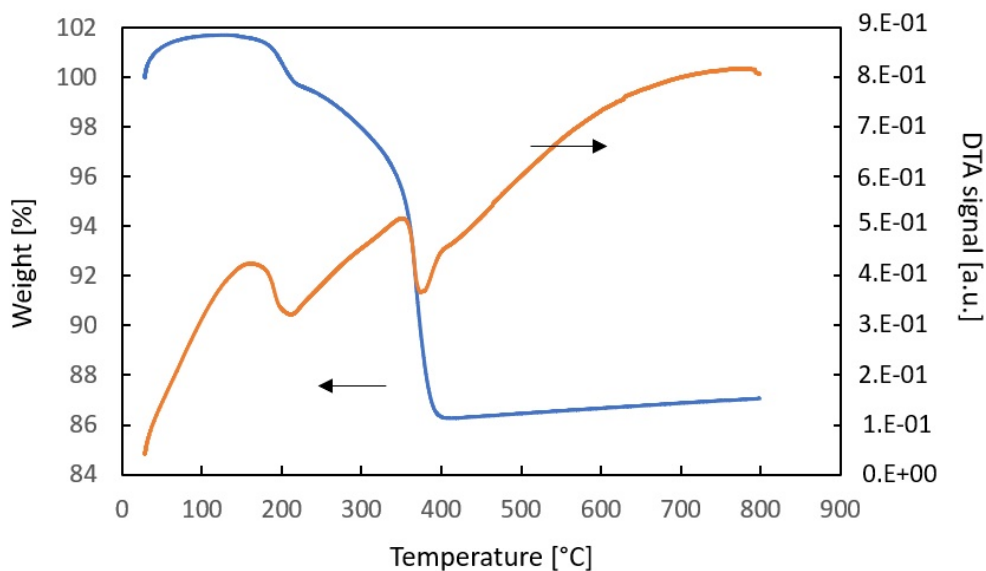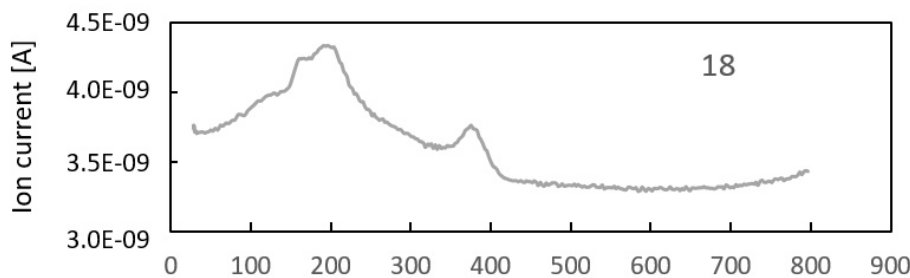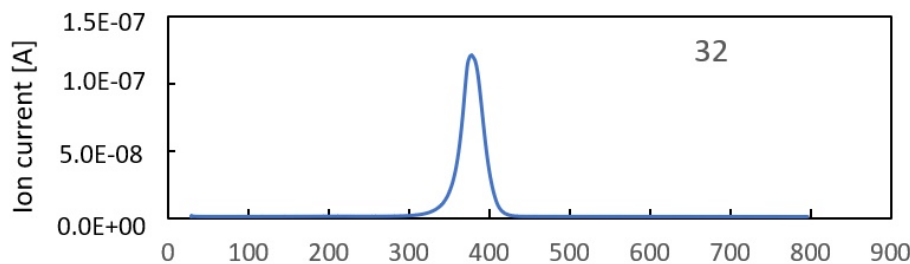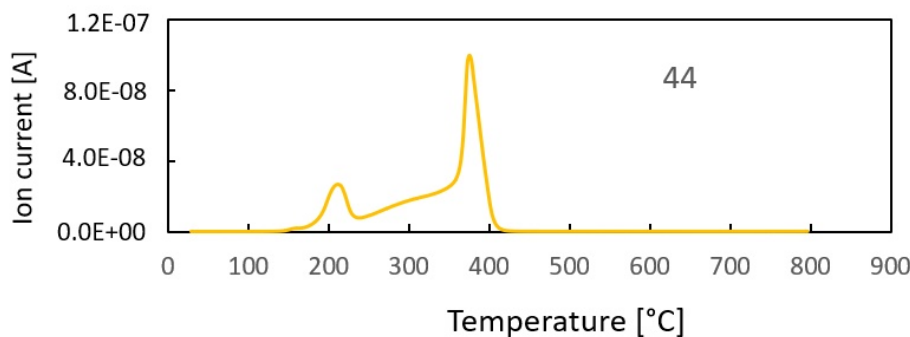

Supplement: d3cy01183f3.pdf [file d3cy01183f3.pdf]
